# Supplementary material
Source: publisher figshare collection journal article supplement (https://sage.figshare.com/ndownloader/files/17947793)
Supplement: Supplementary file 1 [file 17947793]

**OSF Supplemental Table 1. Results from Study 1**

|                | Rating of the relationship now |           |           |                | Projected rating of the relationship in 10 years |           |                   |                | Outcome Variable           |           |           |                |                            |           |           |                |                                  |           |                   |                |
|----------------|--------------------------------|-----------|-----------|----------------|--------------------------------------------------|-----------|-------------------|----------------|----------------------------|-----------|-----------|----------------|----------------------------|-----------|-----------|----------------|----------------------------------|-----------|-------------------|----------------|
|                |                                |           |           |                |                                                  |           |                   |                | Excellency of relationship |           |           |                | Relationship is in trouble |           |           |                | Belief the relationship will end |           |                   |                |
|                | $\beta$                        | b(se)     | t         | R <sup>2</sup> | $\beta$                                          | b(se)     | t                 | R <sup>2</sup> | $\beta$                    | b(se)     | t         | R <sup>2</sup> | $\beta$                    | b(se)     | t         | R <sup>2</sup> | $\beta$                          | b(se)     | t                 | R <sup>2</sup> |
| <b>Model 1</b> |                                |           |           | .0002          |                                                  |           |                   | .0006          |                            |           |           | .0000          |                            |           |           | .0012          |                                  |           |                   | .0003          |
| Intercept      |                                | 8.12(.03) | 251.52*** |                |                                                  | 8.71(.03) | 295.00***         |                |                            | 3.91(.02) | 229.84*** |                |                            | 1.87(.02) | 107.13*** |                |                                  | 1.52(.02) | 120.51***         |                |
| NF Outside     | .01                            | .02(.03)  | 0.83      |                | .03                                              | .04(.04)  | 1.68 <sup>+</sup> |                | .01                        | .01(.01)  | 0.46      |                | .04                        | .03(.01)  | 2.26*     |                | .02                              | .02(.01)  | 1.07              |                |
| <b>Model 2</b> |                                |           |           | .0240          |                                                  |           |                   | .0169          |                            |           |           | .0233          |                            |           |           | .0096          |                                  |           |                   | .0096          |
| Intercept      |                                | 8.04(.03) | 244.19*** |                |                                                  | 8.64(.03) | 286.10***         |                |                            | 3.87(.02) | 222.89*** |                |                            | 1.90(.02) | 105.78*** |                |                                  | 1.54(.01) | 118.94***         |                |
| NF Inside      | .18                            | .29(.03)  | 10.41***  |                | .15                                              | .22(.03)  | 8.55***           |                | .18                        | .15(.01)  | 10.28***  |                | -.11                       | -.09(.02) | -6.14***  |                | -.11                             | -.07(.01) | -6.47***          |                |
| NF Outside     | -.08                           | -.13(.03) | -4.46***  |                | -.05                                             | -.08(.03) | -2.79**           |                | -.08                       | -.07(.02) | -4.72***  |                | .09                        | .08(.02)  | 5.03***   |                | .07                              | .05(.01)  | 4.16***           |                |
| <b>Model 3</b> |                                |           |           |                |                                                  |           |                   | .6145          |                            |           |           |                |                            |           |           | .4598          |                                  |           |                   | .4134          |
| Intercept      |                                |           |           |                |                                                  | 2.82(.07) | 38.47***          |                |                            |           |           |                |                            | 4.86(.05) | 96.32***  |                |                                  | 3.57(.04) | 93.80***          |                |
| Rel. Qual.     |                                |           |           |                | .78                                              | .72(.01)  | 82.76***          |                |                            |           |           |                | -.68                       | -.37(.01) | -60.80*** |                | -.64                             | -.25(.00) | -55.22***         |                |
| NF Inside      |                                |           |           |                | .01                                              | .01(.02)  | 0.85              |                |                            |           |           |                | .01                        | .01(.01)  | 1.04      |                | .00                              | .00(.01)  | 0.19              |                |
| NF Outside     |                                |           |           |                | .01                                              | .02(.02)  | 1.11              |                |                            |           |           |                | .04                        | .04(.01)  | 2.91**    |                | .02                              | .02(.01)  | 1.70 <sup>+</sup> |                |

**Notes.** \*\*\* $p < .001$ , \*\* $p < .01$ , + $p < .10$ . NF Outside was measured in hours per month participants reported receiving “informal emotional support (such as getting comfort, having someone listen to you, or getting advice)” from sources other than their spouse or romantic partner (scaled such that one unit = 50 hours). NF Inside was measured in hours per month participants reported receiving “informal emotional support (such as getting comfort, having someone listen to you, or getting advice)” from their spouse or romantic partner (scaled such that one unit = 50 hours). Rating of the relationship (also “Rel. Qual.”) was measured: “How would you rate your marriage or close relationship these days?” (rated from 0 (‘the worst possible marriage or close relationship’) to 10 (‘the best possible marriage or close relationship,’)). Projected rating of the relationship in 10 years was measured: “Looking ahead ten years into the future, what do you expect your marriage or close relationship will be like at that time?” (rated from 0 (‘the worst possible marriage or close relationship’) to 10 (‘the best possible marriage or close relationship,’)). Excellency of the relationship was measured: “Would you describe your relationship as excellent, very good, good, fair, or poor?” (rated from 1 (poor) to 5 (excellent)). Relationship is in trouble was measured: “During the past year, how often have you thought your relationship might be in trouble?” (rated from 1 (never) to 5 (all of the time)). Belief the relationship will end was measured: “It is always difficult to predict what will happen in a relationship, but realistically, what do you think the chances are that you and your partner will eventually separate?” (rated from 1 (not at all likely) to 4 (very likely)).
